# Supplementary material for: Medical Plant Extract Purification from Cadmium(II) Using Modified Thermoplastic Starch and Ion Exchangers
Source: MDPI journal article supplement (doi:10.3390/ma14164734), 2021-08-22
Supplement: s1 [file s1]

Supplementary materials

# Medical Plant Extract Purification from Cadmium(II) Using Modified Thermoplastic Starch and Ion Exchangers

Yi-Gong Chen <sup>1</sup>, Qian Wang <sup>2</sup>, Anna Wołowicz <sup>3</sup>, Agnieszka Gładysz-Płaska <sup>3</sup>, Monika Wawrzekiewicz <sup>3</sup>, Weronika Sofińska-Chmiel <sup>4</sup>, Gui-Yuan Lv <sup>5</sup>, Dorota Kołodyńska <sup>3,\*</sup> and Su-Hong Chen <sup>1,\*</sup>

<sup>1</sup> Collaborative Innovation Center of Yangtze River Delta Region Green Pharmaceuticals, Zhejiang University of Technology, Chaowang Road 18, 310014 Hangzhou, China; yigongchen@hotmail.com

<sup>2</sup> Hangzhou Fang Hui Chun Tang Group Co., Ltd., 310052 Hangzhou, China; wangq@fhct.com

<sup>3</sup> Department of Inorganic Chemistry, Institute of Chemical Sciences, Faculty of Chemistry, Maria Curie-Skłodowska University, M. Curie Skłodowska Sq. 2, 20-031 Lublin, Poland; anna.wolowicz@poczta.umcs.lublin.pl (A.W.); a.gladysz-plaska@poczta.umcs.lublin.pl (A.G.-P.); m.wawrzekiewicz@poczta.umcs.lublin.pl (M.W.)

<sup>4</sup> Analytical Laboratory, Institute of Chemical Sciences, Faculty of Chemistry, Maria Curie-Skłodowska University, M. Curie Skłodowska Sq. 2, 20-031 Lublin, Poland; wschmiel@poczta.umcs.lublin.pl

<sup>5</sup> College of Pharmaceutical Science, Zhejiang Chinese Medical University, 310053 Hangzhou, China; zjtcmlgy@163.com

\* Correspondence: d.kolodynska@poczta.umcs.lublin.pl (D.K.); chensuhong@zjut.edu.cn (S.-H.C.)

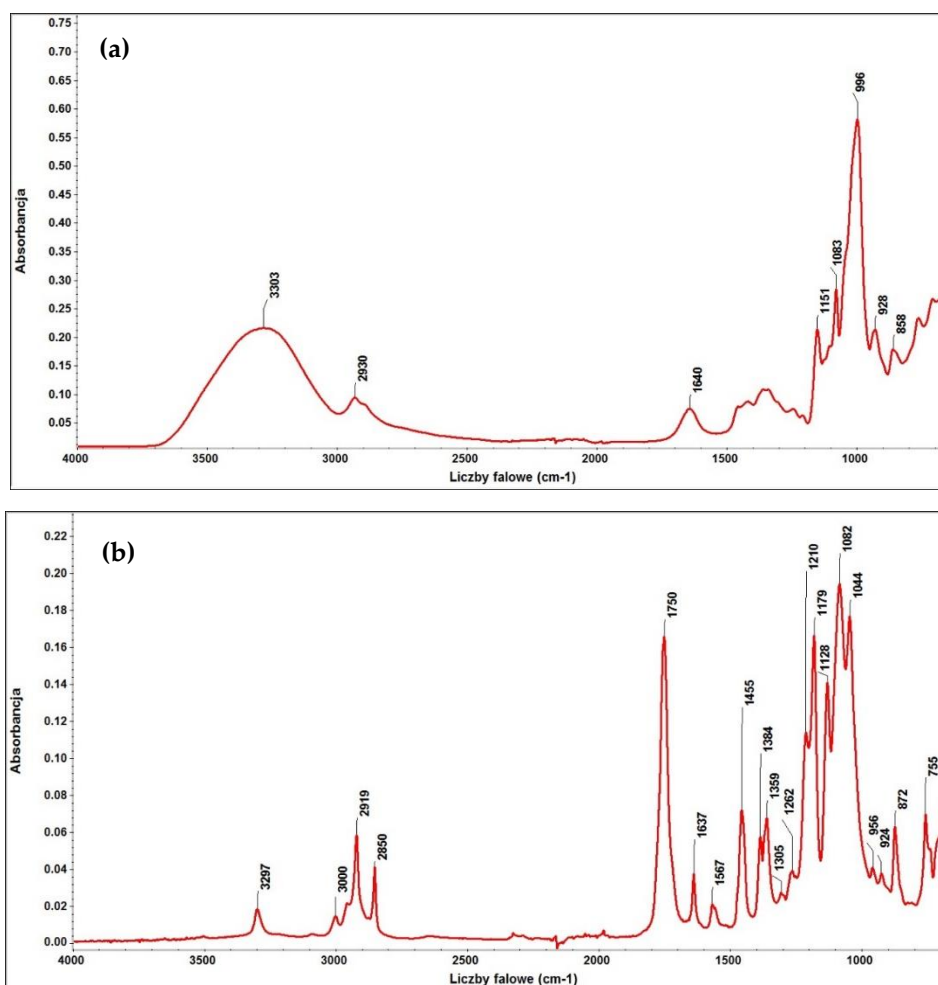

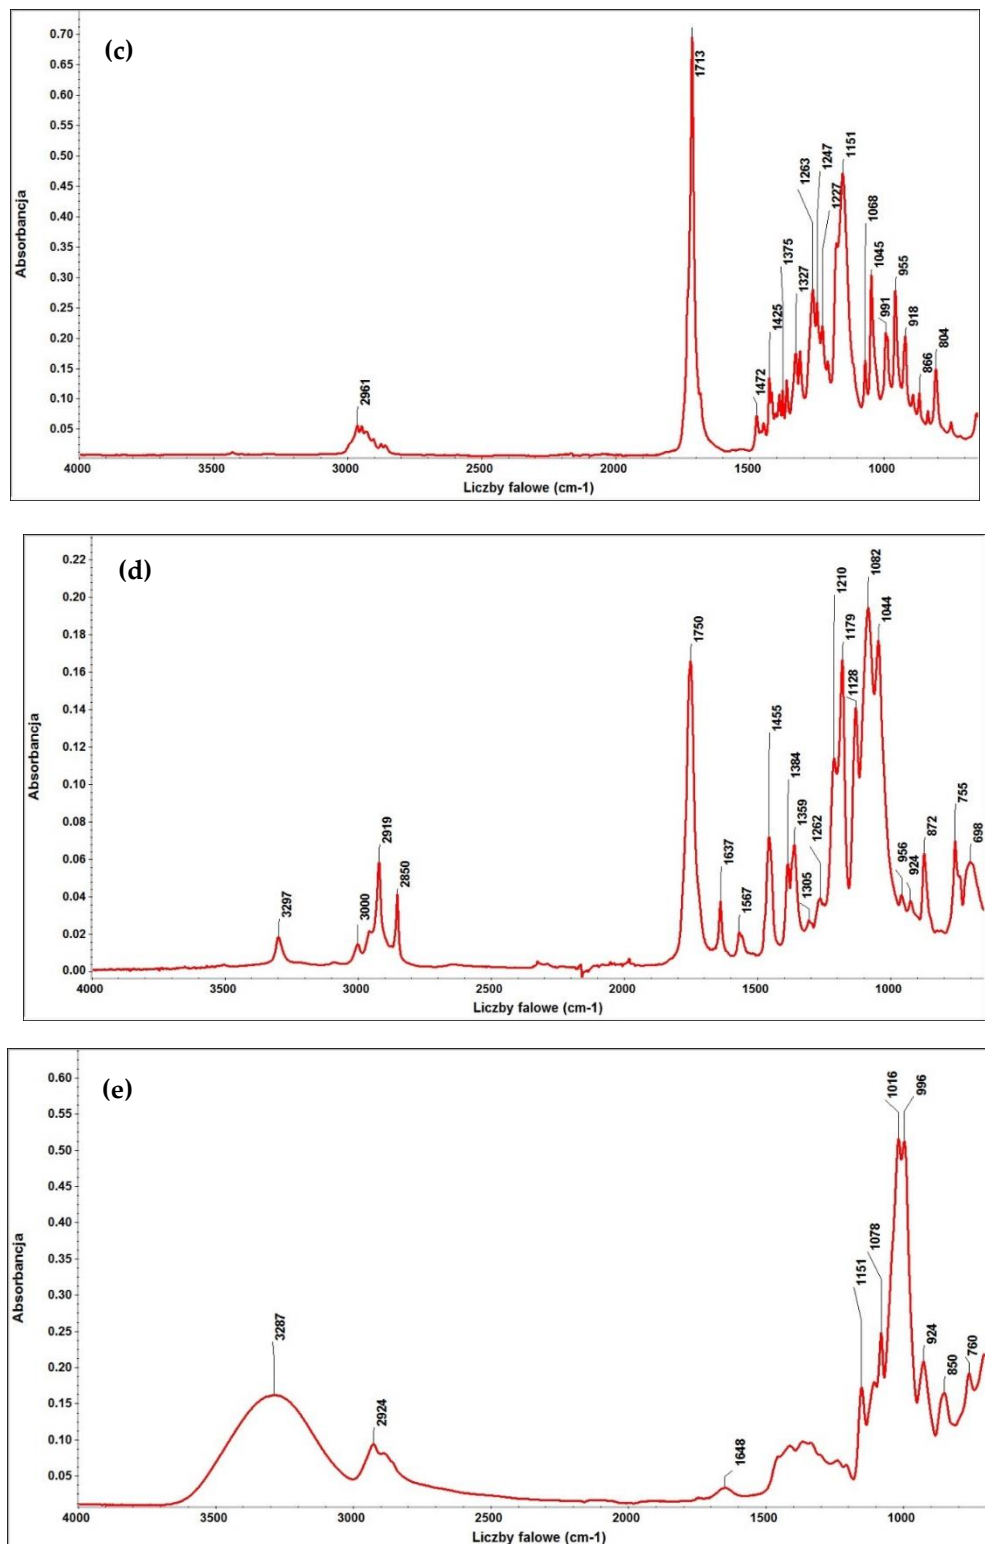

Figure S1. ATR-FTIR spectra of (a) native starch, (b) glycerol, (c) PBS, (d) PLA and (e) TPS.

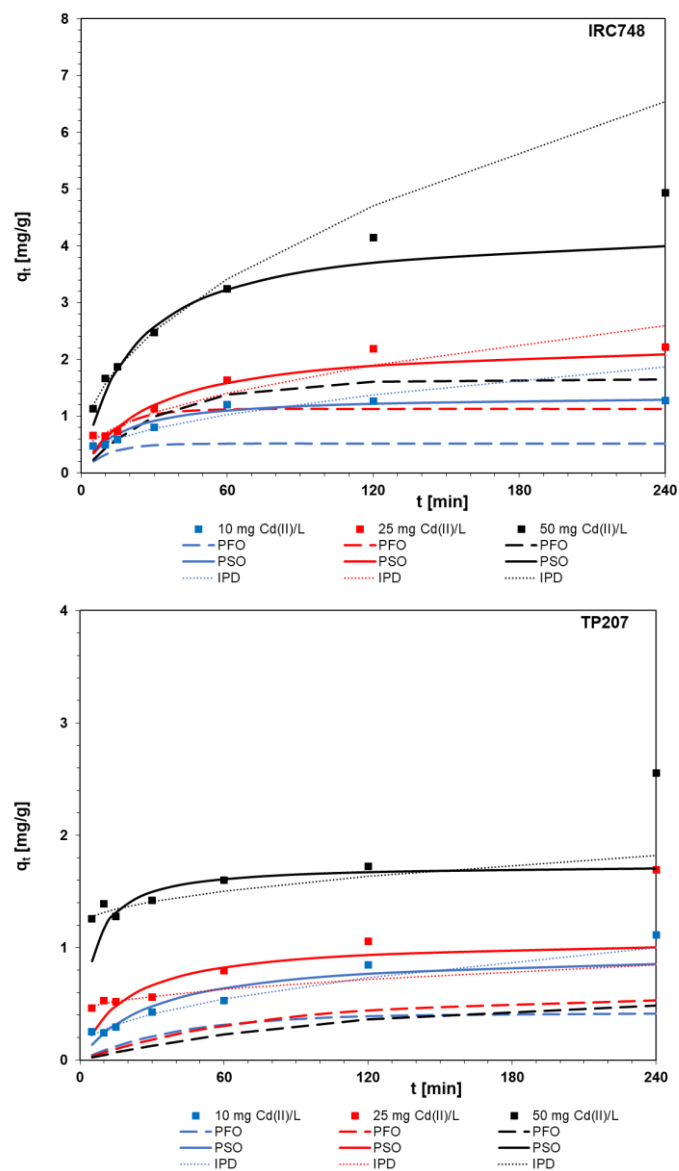

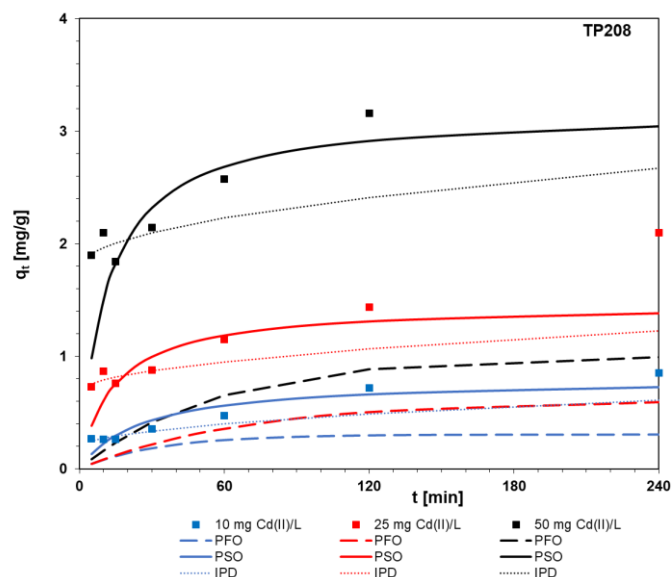

Figure S2. Kinetic curves for Cd(II) sorption on TP747, T207 and TP208.

Table S1. PBS and PLA characterization.

| Parameters                       | PBS   | PLA     |
|----------------------------------|-------|---------|
| Glass transition temperature [K] | 241   | 328     |
| Melting temperature [K]          | 387   | 413–453 |
| HDT deflection temperature [K]   | 97    | 55      |
| Tensile strength [MPa]           | 34    | 66      |
| Elongation at break [%]          | 560   | 4       |
| Crystallinity degree [%]         | 34–45 | 0–40    |

Table S2. Chelating ion exchange resins characteristics.

| Name   | Matrix | Mean bed size [mm] | Total capacity [eq/dm <sup>3</sup> ] | pH range | Water retention [%]          |
|--------|--------|--------------------|--------------------------------------|----------|------------------------------|
| SP112  | PS-DVB | 0.65 (±0.05)       | 1.7 (Na <sup>+</sup> form)           | 0–14     | 52–57 (Na <sup>+</sup> form) |
| S940   | PS-DVB | 0.43–0.85          | -                                    | 0–14     | 55–65 (Na <sup>+</sup> form) |
| IRC747 | PS-DVB | 0.52–0.66          | ≥ 1.75 (Na <sup>+</sup> form)        | 0–14     | 64–69 (Na <sup>+</sup> form) |
| IRC748 | PS-DVB | 0.50–0.65          | ≥ 1.35 (Na <sup>+</sup> form)        | 1.5–14   | 60–65 (Na <sup>+</sup> form) |
| IRC718 | PS-DVB | 0.3–1.2            | -                                    | 0–14     | -                            |
| TP207  | PS-DVB | 0.4–1.25           | 2.42 (Na <sup>+</sup> form)          | 0–14     | 53–58 (Na <sup>+</sup> form) |
| TP208  | PS-DVB | 0.4–1.25           | 2.9 (Na <sup>+</sup> form)           | 0–14     | 55–60 (Na <sup>+</sup> form) |
| S930   | PS-DVB | 0.60–0.85          | 2.40 (Na <sup>+</sup> form)          | 2–6      | 55–65 (Na <sup>+</sup> form) |

PS-DVB—polystyrene crosslinked with divinylbenzene.

Table S3. Description of kinetic and isotherm models.

| Model          | Equation | Parameters | Plot |
|----------------|----------|------------|------|
| Kinetic models |          |            |      |

|                                             |                                                       |                                                                                                                                                                                                                  |                                                                                                                                                           |
|---------------------------------------------|-------------------------------------------------------|------------------------------------------------------------------------------------------------------------------------------------------------------------------------------------------------------------------|-----------------------------------------------------------------------------------------------------------------------------------------------------------|
| Pseudo-first order kinetic equation<br>PFO  | $\log(q_e - q_t) = \log q_e - \frac{k_1 t}{2.303}$    | $k_1$ [1/min] is the rate constant of PFO equation<br>$q_e$ [mg/g] is the adsorption capacity                                                                                                                    | $\log(q_e - q_t)$ vs. $t$<br>$k_1 = -2.303 \times \text{slope}$<br>$q_e = 10^{\text{intercept}}$                                                          |
| Pseudo-second order kinetic equation<br>PSO | $\frac{t}{q_t} = \frac{1}{k_2 q_e^2} + \frac{t}{q_e}$ | $k_2$ [g/mg min) is the rate constant of PSO equation<br>$q_e$ [mg/g] is the adsorption capacity<br>$h$ [mg/g min] is the initial sorption rate                                                                  | $t/q_t$ vs. $t$<br>$k_2 = \text{slope}^2/\text{intercept}$<br>$q_e = 1/\text{slope}$<br>$h = k_2 q_e^2$                                                   |
| Intraparticle diffusion<br>IPD              | $q_t = k_i t^{0.5} + C$                               | $k_i$ is the intraparticle diffusion rate constant [mg/g·min <sup>0.5</sup> ],<br>C in the constant illustrating the effect of the boundary layer on the sorption process                                        | $q_t$ vs. $t^{0.5}$                                                                                                                                       |
| <b>Isotherm models</b>                      |                                                       |                                                                                                                                                                                                                  |                                                                                                                                                           |
| Freundlich                                  | $\log q_e = \log k_F + \frac{1}{n} \log C_e$          | $k_F$ is the Freundlich adsorption capacity [mg/g]<br>$1/n$ is the Freundlich constant related to the surface heterogeneity                                                                                      | $\log q_e$ vs. $\log C_e$<br>$k_F = 10^{\text{intercept}}$ [mg/g]<br>$1/n = \text{slope}$                                                                 |
| Langmuir                                    | $\frac{C_e}{q_e} = \frac{1}{Q_0 b} + \frac{C_e}{Q_0}$ | $Q_0$ is the Langmuir monolayer sorption capacity [mg/g]<br>$b$ is the Langmuir constant related to the free energy of sorption [dm <sup>3</sup> /mg]<br>$R_L$ is the separation factor or equilibrium parameter | $C_e/q_e$ vs. $C_e$<br>$Q_0 = 1/\text{slope}$ [mg/g]<br>$b = \text{slope}/\text{intercept}$ [dm <sup>3</sup> /mg]<br>$R_L = \frac{1}{(1 + b \times C_0)}$ |

**Table S4.** Kinetic parameters obtained for TPS (S3) and ion exchangers (IRC748, TP207, TP208).

| System                | $q_{e,\text{exp}}$<br>[mg/g] | PFO             |                  |       | PSO             |                     |                   | IPD   |                                                |       |
|-----------------------|------------------------------|-----------------|------------------|-------|-----------------|---------------------|-------------------|-------|------------------------------------------------|-------|
|                       |                              | $q_e$<br>[mg/g] | $k_1$<br>[1/min] | $R^2$ | $q_e$<br>[mg/g] | $k_2$<br>[g/mg min] | $h$<br>[mg/g min] | $R^2$ | $k_{\text{int}}$<br>[mg/g min <sup>0.5</sup> ] | $R^2$ |
| S3                    |                              |                 |                  |       |                 |                     |                   |       |                                                |       |
| 10 mg/dm <sup>3</sup> | 0.75                         | 0.60            | 0.041            | 0.879 | 0.76            | 0.184               | 0.11              | 0.998 | 0.030                                          | 0.649 |
| 25 mg/dm <sup>3</sup> | 1.71                         | 0.74            | 0.009            | 0.888 | 1.52            | 0.138               | 0.32              | 0.999 | 0.066                                          | 0.862 |
| 50 mg/dm <sup>3</sup> | 2.75                         | 0.42            | 0.014            | 0.456 | 2.95            | 0.109               | 0.95              | 0.998 | 0.047                                          | 0.402 |
| IRC748                |                              |                 |                  |       |                 |                     |                   |       |                                                |       |
| 10 mg/dm <sup>3</sup> | 1.28                         | 1.19            | 0.042            | 0.987 | 1.36            | 0.050               | 0.09              | 0.996 | 0.108                                          | 0.941 |
| 25 mg/dm <sup>3</sup> | 2.21                         | 2.59            | 0.036            | 0.945 | 2.34            | 0.015               | 0.08              | 0.978 | 0.152                                          | 0.952 |
| 50 mg/dm <sup>3</sup> | 4.93                         | 3.80            | 0.013            | 0.996 | 4.33            | 0.011               | 0.21              | 0.988 | 0.403                                          | 0.985 |
| TP207                 |                              |                 |                  |       |                 |                     |                   |       |                                                |       |
| 10 mg/dm <sup>3</sup> | 1.11                         | 0.96            | 0.010            | 0.979 | 0.96            | 0.034               | 0.03              | 0.980 | 0.059                                          | 0.869 |
| 25 mg/dm <sup>3</sup> | 1.69                         | 1.28            | 0.006            | 0.988 | 1.08            | 0.049               | 0.06              | 0.976 | 0.028                                          | 0.889 |
| 50 mg/dm <sup>3</sup> | 2.55                         | 1.28            | 0.004            | 0.921 | 1.74            | 0.119               | 0.36              | 0.999 | 0.041                                          | 0.472 |
| TP208                 |                              |                 |                  |       |                 |                     |                   |       |                                                |       |
| 10 mg/dm <sup>3</sup> | 0.85                         | 0.70            | 0.013            | 0.967 | 0.80            | 0.048               | 0.03              | 0.981 | 0.028                                          | 0.725 |
| 25 mg/dm <sup>3</sup> | 2.10                         | 1.41            | 0.006            | 0.975 | 1.46            | 0.048               | 0.10              | 0.986 | 0.035                                          | 0.821 |
| 50 mg/dm <sup>3</sup> | 4.07                         | 2.32            | 0.008            | 0.972 | 3.18            | 0.028               | 0.28              | 0.989 | 0.057                                          | 0.281 |
